# Supplementary material for: PLK-1 promotes the merger of the parental genome into a single nucleus by triggering lamina disassembly
Source: eLife. 2020 Oct 8;9:e59510. doi: 10.7554/eLife.59510 (PMC7544505; doi:10.7554/eLife.59510)
Supplement: Figure 1—source data 1. [file elife-59510-fig1-data1.xlsx]

## Sheet: Figure 1H
LMN-1 [ H ]	WT	3A	4A	7A
Experiment 1	100	95	40	50
Experiment 2	100	96	39	40
Experiment 3	100	71	67	63
Number of values	3	3	3	3
Minimum	100	71	39	40
25% Percentile	100	71	39	40
Median	100	95	40	50
75% Percentile	100	96	67	63
Maximum	100	96	67	63
Mean	100	87.33	48.67	51
Std. Deviation	0	14.15	15.89	11.53
Std. Error of Mean	0	8.172	9.171	6.658
Lower 95% CI of mean	100	52.17	9.206	22.35
Upper 95% CI of mean	100	122.5	88.13	79.65
Sum	300	262	146	153

## Sheet: Figure 1I
LMN-1 [ T1 ]	WT	4A	6A
Experiment 1	100	14	0
Experiment 2	100	20	0
Experiment 3	100	23	0
Number of values	3	3	3
Minimum	100	14	0
25% Percentile	100	14	0
Median	100	20	0
75% Percentile	100	23	0
Maximum	100	23	0
Mean	100	19	0
Std. Deviation	0	4.583	0
Std. Error of Mean	0	2.646	0
Lower 95% CI of mean	100	7.616	0
Upper 95% CI of mean	100	30.38	0
Sum	300	57	0
