# Supplementary material for: PLK-1 promotes the merger of the parental genome into a single nucleus by triggering lamina disassembly
Source: eLife. 2020 Oct 8;9:e59510. doi: 10.7554/eLife.59510 (PMC7544505; doi:10.7554/eLife.59510)
Supplement: Figure 3—source data 1. [file elife-59510-fig3-data1.xlsx]

## Sheet: Figure 3D
Quantification data related to Figure 3D
GFP::LMN-1 flourescence intensity during mitosis control vs plk-1(RNAi)
GFP::LMN-1 ctrl(RNAi)
	Embryo
Time (sec)	1	2	3	4	5	6	MEAN	SD	SEM
-120	1	1	1	1	1	1	1	0	0
-110	0.911262	0.92407	1.06319	0.975142	1.07481	0.888071	0.972758	0.0799036	0.0326205
-100	0.701749	0.785041	0.95749	0.978527	0.979621	0.764569	0.861166	0.124598	0.050867
-90	0.630814	0.77835	0.696563	0.893036	0.821378	0.675679	0.749303	0.0989338	0.0403895
-80	0.509814	0.576807	0.740184	0.881062	0.709191	0.569248	0.664384	0.138069	0.0563663
-70	0.356595	0.507131	0.804434	0.804183	0.589548	0.415863	0.579626	0.191248	0.0780767
-60	0.225239	0.412333	0.686775	0.682069	0.464107	0.354512	0.470839	0.183612	0.0749591
-50	0.114358	0.326933	0.621739	0.514637	0.37701	0.261937	0.369436	0.180679	0.0737619
-40	0.108824	0.207173	0.49701	0.400551	0.278462	0.198927	0.281824	0.143378	0.0585337
-30	0.05047	0.130466	0.290842	0.288343	0.193285	0.114379	0.177964	0.097687	0.0398806
-20	0.0423486	0.0860025	0.192689	0.192744	0.0991889	0.0610128	0.112331	0.0653003	0.0266588
-10	0	0.0251286	0.0415191	0.117516	0.0682441	0.0234904	0.045983	0.0416837	0.0170173
0	0	0	0	0.0527208	0.0405741	0	0.0155491	0.024393	0.00995838
10	0	0	0	0.0198767	0	0	0.00331278	0.00811463	0.00331278
20	0	0	0	0	0	0	0	0	0
30	0	0	0	0.00128849	0	0	0.000214748	0.000526023	0.000214748
40	0	0	0	0	0	0	0	0	0
50	0	0	0	0	0	0	0	0	0
60	0	0	0	0	0	0	0	0	0
70	0	0	0	0	0	0	0	0	0
80	0	0	0	0	0	0	0	0	0
90	0	0	0	0	0	0	0	0	0
GFP::LMN-1 plk-1(RNAi)
	Embryo
Time (sec)	1	2	3	4	5	MEAN	SD	SEM
-120	1	1	1	1	1	1	0	0
-110	0.993376	1.04234	1.03289	0.934109	1.12217	1.02498	0.0690387	0.0281849
-100	1.02006	1.0516	1.05339	0.937546	0.973849	1.00729	0.0505822	0.0206501
-90	0.960554	1.03559	1.03482	0.896693	1.00876	0.987284	0.0591094	0.0241313
-80	0.990746	1.06119	1.00337	0.923781	1.0428	1.00438	0.053355	0.0217821
-70	1.01615	0.995947	1.05773	0.859844	1.01352	0.988639	0.0754835	0.030816
-60	0.992498	1.04599	1.00308	0.837464	1.06822	0.989451	0.0904109	0.0369101
-50	0.920183	0.997897	1.01323	0.88255	1.05672	0.974115	0.0710843	0.02902
-40	0.970833	0.977275	0.985316	0.842926	0.994463	0.954163	0.0628099	0.0256421
-30	1.00423	0.85923	1.03971	0.901919	1.10138	0.981296	0.0994484	0.0405996
-20	1.07032	1.07161	0.999493	0.907982	1.06725	1.02333	0.0713097	0.0291121
-10	0.99982	1.10272	0.982583	0.941731	0.994731	1.00432	0.059548	0.0243104
0	1.01814	0.969286	1.03151	0.945869	1.08719	1.0104	0.0553558	0.0225989
10	1.03814	1.06916	1.01504	0.926158	1.05899	1.0215	0.0571962	0.0233503
20	1.02908	0.897388	1.0675	1.05177	1.11186	1.03152	0.0808655	0.0330132
30	1.05262	0.908403	1.13392	1.00083	1.19253	1.05766	0.111286	0.0454323
40	1.08286	0.960266	1.16105	1.0797	1.2044	1.09766	0.0933162	0.0380962
50	1.07777	0.868081	1.1352	0.942889	1.20122	1.04503	0.137242	0.0560287
60	1.09765	0.931145		0.945158	1.19828	1.04306	0.128041	0.0522724
70	1.10822	0.93631	1.02597	0.826194	1.25538	1.03041	0.163741	0.066847
80	1.09776	1.18385	1.1118		1.27842	1.16796	0.0827346	0.0337763
90	1.13596	1.09664	1.29938	0.915857	1.30865	1.1513	0.162283	0.0662518

## Sheet: Figure 3F
Quantification data related to Figure 3F
GFP::LMN-1 8A fluorescence intensity during mitosis in control vs plk-1(RNAi)
GFP::LMN-1 8A ctrl(RNAi)
	Embryo
Time(sec)	1	2	3	4	5	6	7	MEAN	SD	SEM
-120	1	1	1	1	1	1	1	1	0	0
-110	1.00768	0.935501	1.12052	1.01507	1.02338	0.984729	1.00047	1.01328	0.0516321	0.0195151
-100	0.973512	0.925699	0.978973	0.916425	0.971994	0.98766	0.984953	0.960951	0.0269908	0.0102016
-90	0.937737	0.972555	0.998116	0.890671	0.960564	0.893906	0.946442	0.943709	0.0366613	0.0138567
-80	0.849382	0.887423	1.03156	0.839867	0.977243	0.895415	0.947715	0.92987	0.0650948	0.0246035
-70	0.852078	0.921737	1.06801	0.860381	0.933784	0.855942	0.938834	0.929782	0.0705314	0.0266584
-60	0.854216	0.875213	0.989092	0.806627	0.983779	0.81277	0.888941	0.892737	0.0686632	0.0259523
-50	0.918049	0.837425	0.86567	0.878552	0.967384	0.805669	0.85822	0.86882	0.0493184	0.0186406
-40	0.849608	0.815454	0.965889	0.885745	0.925161	0.806447	0.868161	0.87781	0.0532286	0.0201185
-30	0.820155	0.810579	0.890892	0.909373	0.970915	0.769693	0.85041	0.866977	0.063257	0.0239089
-20	0.752026	0.775327	0.867403	0.956934	0.880826	0.80609	0.889631	0.862702	0.0670956	0.0253597
-10	0.750445	0.758885	0.870774	0.907205	0.914879	0.800148	0.864366	0.85271	0.0632608	0.0239103
0	0.735483	0.745152	0.871009	0.842752	0.829062	0.785821	0.761352	0.805858	0.048617	0.0183755
10	0.732405	0.742473	0.923817	0.925808	0.755173	0.767119	0.748469	0.810477	0.0800789	0.030267
20	0.700321	0.648309	0.896169	0.912451	0.722452	0.724372	0.653944	0.759616	0.100897	0.0381353
30	0.686035	0.631513	0.851378	0.88203	0.64077	0.71348	0.631071	0.72504	0.0976517	0.0369089
40	0.696853	0.579108	0.795955	0.847531	0.564542	0.666822	0.559908	0.668978	0.106616	0.040297
50	0.584807	0.519393	0.855088	0.880253	0.570998	0.629155	0.628314	0.680534	0.131858	0.0498377
60	0.573764	0.530974	0.843213	0.865479	0.521795	0.578908	0.623902	0.660712	0.134179	0.0507149
70	0.370998	0.454316	0.707484	0.869083	0.523094	0.495382	0.566408	0.602628	0.155873	0.0589144
80	0.359619	0.414686	0.754171	0.738105	0.48061	0.407999	0.526132	0.553617	0.148218	0.0560212
90	0.319667	0.356776	0.720558	0.737687	0.449624	0.400241	0.468259	0.522191	0.156792	0.0592617
GFP::LMN-1 8A plk-1(RNAi)
	Embryo
Time(sec)	1	2	3	4	5	6	7	8	9	MEAN	SD	SEM
-120	1	1	1	1	1	1	1	1		1	0	0
-110	1.02542	1.00898	1.03289	1	0.992053	0.888943	1.0063	0.983903	1	0.993166	0.0419579	0.0132683
-100	0.987341	0.945082	1.05339	1.0611	0.927283	0.942881	0.982274	0.918924	0.865993	0.964918	0.0633236	0.0200247
-90	1.01114	0.868322	1.03482	1.08384	0.962688	0.951053	0.9675	0.922565	0.896378	0.966479	0.0681631	0.0215551
-80	0.999748	0.926234	1.00337	0.945709	0.948316	0.967662	0.922048	0.882318	0.927837	0.947027	0.038722	0.012245
-70	0.98768	0.902777	1.05773	1.01469	0.94309	0.999693	0.926735	0.909278	0.90085	0.960281	0.0565926	0.0178961
-60	0.978045	0.880111	1.00308	1.07573	0.926114	0.905711	0.924156	0.846269	0.949034	0.943139	0.0687692	0.0217467
-50	0.948614	0.886573	1.01323	1.02693	0.981451	0.920262	0.86285	0.824252	0.940082	0.933804	0.06797	0.021494
-40	0.956025	0.885078	0.985316	0.977412	0.936144	0.953887	0.946641	0.868699	0.883171	0.932486	0.0429876	0.0135939
-30	0.931672	0.883645	1.03971	1.0249	0.970464	1.00251	0.899745	0.829612	0.979207	0.951274	0.0702056	0.022201
-20	0.878752	0.869143	0.999493	1.01183	0.91227	0.97014	0.88067	0.887628	0.948978	0.928767	0.0551773	0.0174486
-10	0.882612	0.937738	0.982583	1.12386	0.914714	0.940354	0.784516	0.893213	0.884153	0.927082	0.0918809	0.0290553
0	0.921297	0.852918	1.03151	1.09845	1.01315	0.954142	0.973042	0.926525	0.96895	0.97111	0.071034	0.0224629
10	0.963234	0.968112	1.01504	1.10645	1.0003	1.05097	0.79176	0.930482	0.942614	0.97433	0.0880944	0.0278579
20	0.832909	0.98822	1.0675	1.06681	1.01554	0.905834	0.924937	0.911462	0.990645	0.967095	0.0790589	0.0250006
30	0.958807	1.06117	1.13392	1.16383	1.09324	0.99641	0.930695	1.03534	1.06158	1.04833	0.077249	0.0244283
40	0.696937	1.06959	1.16105	1.13425	1.09991			0.984693	1.07265	1.0313	0.157739	0.0498815
50	0.754544	1.19514	1.1352		1.00303		1.04082	1.06257	1.0691	1.0372	0.139812	0.0442124
60	0.620935	1.16962	0.727463	1.12579	0.484034	1.23483	1.04431	0.928075	1.06705	0.933566	0.263589	0.0833543
70	0.53966	1.14651	1.02597	1.48162	1.18354		0.860703	0.929769	1.11867	1.03581	0.274607	0.0868382
80	0.571598	0.724263	1.1118	1.59542	1.19683	0.995599	1.01061	0.81269	1.13847	1.01747	0.299368	0.0946683
90	0.510231	0.899658	1.29938	1.37238	0.928914	0.969115	1.0531		1.16579	1.02482	0.26982	0.0853245
