# Supplementary material for: PLK-1 promotes the merger of the parental genome into a single nucleus by triggering lamina disassembly
Source: eLife. 2020 Oct 8;9:e59510. doi: 10.7554/eLife.59510 (PMC7544505; doi:10.7554/eLife.59510)
Supplement: Figure 4—source data 1. [file elife-59510-fig4-data1.xlsx]

## Sheet: Figure 4C
		N2	lmn-1 8A		Col Stats	N2	lmn-1 8A		Table Analyzed	Data 1
		100	83.7104		Number of values	21	27
		99.61832	80.65694						Column B	lmn-1 8A
		98.63014	89.32385		Minimum	98.63	68.57		vs.	vs,
		99.04459	81.06996		25% Percentile	99.26	72.7		Column A	N2
		99.6337	91.28205		Median	99.6	81
		99	86.27451		75% Percentile	100	86.64		Mann Whitney test
		100	80.57554		Maximum	100	91.3		P value	< 0,0001
		99.47644	88.21138						Exact or approximate P value?	Exact
		100	86.6426		Mean	99.57	80.38		P value summary	****
		99.52831	72.69939		Std. Deviation	0.4269	7.254		Significantly different? (P < 0.05)	Yes
		100	71.17647		Std. Error of Mean	0.09317	1.396		One- or two-tailed P value?	Two-tailed
		100	71.69118						Sum of ranks in column A,B	798 , 378
		100	77.93594		Lower 95% CI of mean	99.38	77.51		Mann-Whitney U	0
		99	68.57143		Upper 95% CI of mean	99.77	83.25
		99	83
		99.6	81		Sum	2091	2170
		99.5	89
		100	81
		99.5	86.7
		100	91.3
		99.5	86.3
			80.6
			74
			69.4
			71.7
			77.9
			68.6
