# Supplementary material for: PLK-1 promotes the merger of the parental genome into a single nucleus by triggering lamina disassembly
Source: eLife. 2020 Oct 8;9:e59510. doi: 10.7554/eLife.59510 (PMC7544505; doi:10.7554/eLife.59510)
Supplement: Supplementary file 1. [file elife-59510-supp1.xlsx]

## Sheet: Sheet1
	Residues		Peptides	# PSMs	m/z [Da]	Ion Score	phosphoRS Binomial Peptide Score
	S18		IVTLERsANSSLS	3	851.695	62	113.404
	S21		LERSANsSLSNNG	12	851.695	65	128.583
	S22		ERSANSsLSNNGG	17	1183	73	208.272
	S32		NGGGDDsFGSTLL	10	851.696	40	120.265
	S35		GDDSFGsTLLETS	6	1183	15	96.9664
	T36		DDSFGStLLETSR	12	789.002	29	116.939
	T40		GSTLLEtSRLQEK	6	763.593	23	104.347
	S41		STLLETsRLQEKD	12	851.695	56	161.157
	T390		AGFLNLtQEAPQN	16	795.373	23	107.599
	T397		QEAPQNtSVHHVS	15	1060.16	33	68.5702
	S398		EAPQNTsVHHVSF	15	1060.16	33	75.1485
	S403		TSVHHVsFSSGGA	5	795.372	8	68.3834
	S405		VHHVSFsSGGASA	3	1060.16	39	99.6029
	S406		HHVSFSsGGASAQ	3	1060.16	38	85.6732
