# Supplementary material for: PLK-1 promotes the merger of the parental genome into a single nucleus by triggering lamina disassembly
Source: eLife. 2020 Oct 8;9:e59510. doi: 10.7554/eLife.59510 (PMC7544505; doi:10.7554/eLife.59510)
Supplement: Supplementary file 2. — Phosphorylated serine and threonine residues (pS and pT) are highlighted in yellow and green respectively. Most phosphosites match the previously described Plk1 consensus motifs [L(Φ)-D/E/N/Q-X-pS/pT-L(Φ) or p[S/T]-F] (Santamaria et al., 2011; Kettenbach et al., 2011). D/E/N/Q residues are highlighted in blue, hydrophobic (Φ) in orange and F. in red. [file elife-59510-supp2.xlsx]

## Sheet: Feuil1
	Position	-3	-2	-1	0	1	in vivo	[L(F)-D/E/N/Q-X-pS/pT-L(F)	pS/pT - F
	S18	L	E	R	pS	A		(+++)
	S21	S	A	N	pS	S	x
	S22	A	N	S	pS	L	x	(+++)
	S24	S	S	L	pS	N	x
	S32	G	D	D	pS	F	x	(+++)	(+++)
	S35	S	F	G	pS	T
	T36	F	G	S	pT	L		(++)
	T40	L	L	E	pT	S		(+)
	S41	L	E	T	pS	R		(++)
	T390	L	N	L	pT	Q		(++)
	T397	P	Q	N	pT	S	x	(++)
	S398	Q	N	T	pS	V	x	(++)
	S403	H	H	V	pS	F	x		(+++)
	S405	V	S	F	pS	S	x	(+)
	S406	S	F	S	pS	G		(+)
